# Supplementary material for: Early Phenylpropanoid Biosynthetic Steps in Cannabis sativa: Link between Genes and Metabolites
Source: PubMed Central journal article supplement (PMC3742207; doi:10.3390/ijms140713626), 2013-06-28
Supplement: ijms-14-13626-s001.pdf [file ijms-14-13626-s001.pdf]

# Supplementary Information

**Figure S1.** Amino acid sequences of Cs PAL were aligned with PAL representatives of other plant species *Ricinus communis*, *Vitis vinifera*, *Morus alba*, *Jatropha curcas*, *Trifolium pratense*, *Manihot esculentia* and *Populus trichocarpa*. The conserved active site GTITASGDLVPLSYIA aa 210–235, including the invariable active site motif, the Ala-Ser-Gly is indicated as MIO domain and delimited with a solid line box. \* Indicates amino acid residues involved in PAL enzymatic activity.

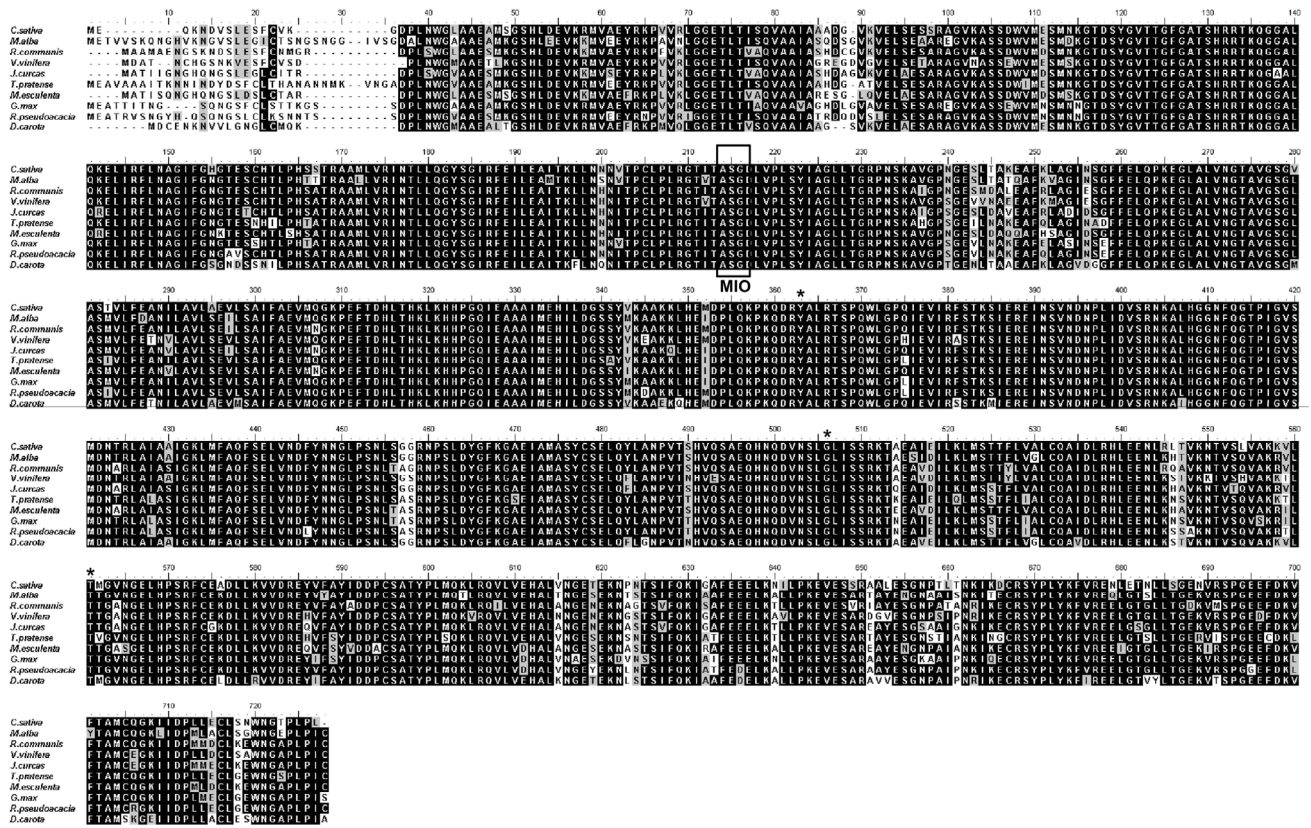

**Figure S2.** Amino acid sequences of Cs 4CL was aligned with 4CL representatives of other plant species *Humulus lupulus*, *Sorbus aucuparia*, *Pyrus pyrifolia*, *Betula platyphylla*, *Medicago truncatula*, *Ruta graveolans*. The hydroxycinnamate binding pocket is indicated with the dashed-line box. The key amino acid residuals involved in hydroxycinnamate binding are indicated with asterisks. The 4CL-conserved Box I motif (PYSSGTTGLPKG) and Box II motif (GEICIRG) are delimited with a solid line. \* Indicates amino acid residues involved in 4CL enzymatic activity.

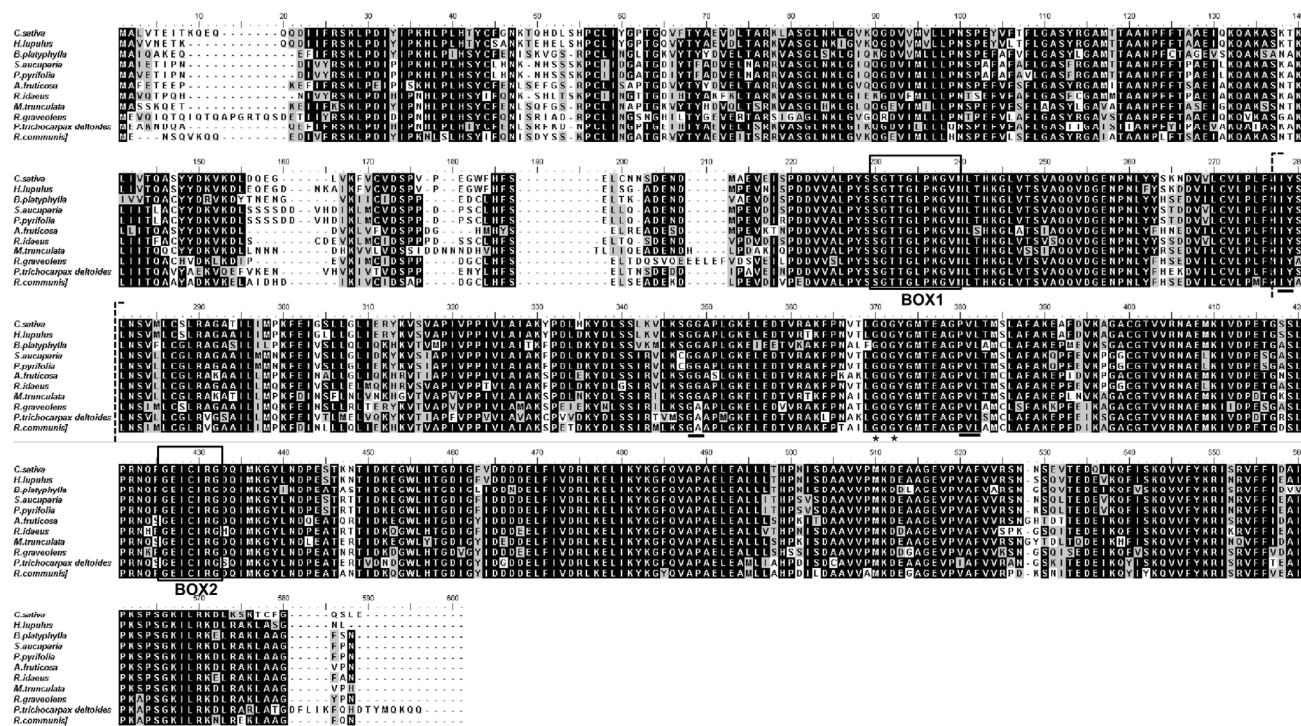

**Figure S3.** Southern blot analysis of *CsPAL* and *Cs4CL* genomic DNAs. DNA was extracted from hemp leaves and digested with *EcoRI* restriction enzyme. 1KB was used as marker.

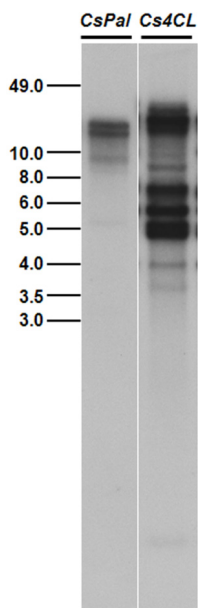

**Table S1.** List of primers used in this study.

| Gene         | Accession number | Sequence                                                   | Orientation | Purpose            |
|--------------|------------------|------------------------------------------------------------|-------------|--------------------|
| <i>PAL</i>   | EC855392         | GCAAGGTAAGCCTGAGTTCACCG                                    | For         | Gsp1-3' race       |
| <i>PAL</i>   | EC855392         | GCTCAGCACTTTGGACATGGCTAGT                                  | Rev         | Gsp1-5' race       |
| <i>PAL</i>   | EC855392         | GCAGCCTCAATTTGACCAGGATGGTGCT                               | Rev         | Gsp2-5' race       |
| <i>PAL</i>   | EC855392         | CGCAATGGCAAACAAGGGGTGACATTG                                | Rev         | Gsp nested 5' race |
| <i>PAL</i>   | EC855392         | TTGGTGGCTCTTTGCCAAGCCATTGAC                                | For         | Gsp2-3' race       |
| <i>4CL</i>   | EC855340         | GTCACGTTAGGCCAGGGATA                                       | For         | Gsp1-3' race       |
| <i>4CL</i>   | EC855340         | GGAACCAGTTTCAGGGTCAA                                       | Rev         | Gsp1-5' race       |
| <i>4CL</i>   | EC855340         | CTCACCATCCACTTGTTGAGCCACGCTA                               | Rev         | Gsp2-5' race       |
| <i>4CL</i>   | EC855340         | TGCCCCTGCTGAGCTCGAAGCTTTGCTT                               | For         | Gsp nested 3' race |
| <i>PAL</i>   | KC970300         | ATGGAGCAGAAAAACGACGTGTCGT                                  | For         | CsPAL1             |
| <i>PAL</i>   | KC970300         | TTAACACAATGGAAGTGGGGTACCATTCC                              | Rev         | CsPAL2             |
| <i>4CL</i>   | KC970301         | ATGGCACTAGTTACCGAAATAACAAAGCAA                             | For         | Cs4CL1             |
| <i>4CL</i>   | KC970301         | TCATTCTAAAGATTGCCCAAAGCAAG                                 | Rev         | Cs4CL2             |
| <i>PAL</i>   | KC970302         | AACAACAACCTCCATCTGCAA                                      | For         | Intron             |
| <i>PAL</i>   | KC970302         | CAACTTGTGAGTCAAGTGATC                                      | Rev         | Intron             |
| <i>4CL</i>   | KC970303         | TGCTTCCTCTGTTTCATATCT                                      | For         | Intron             |
| <i>4CL</i>   | KC970303         | AATTCTTTACCATCTTGCTTG                                      | Rev         | Intron             |
| Gene         | Amplicon size    | Sequence                                                   | Orientation | Purpose            |
| <i>PAL</i>   | 144 bp           | ATTGATATCATCAAGGAAGAGTGCTGAGT<br>TGCGGAAGTCAGAACTTTCTTAGCA | For<br>Rev  | qPCR               |
| <i>4CL</i>   | 156 bp           | GTCACGTTAGGCCAGGGATA<br>GGAACCAGTTTCAGGGTCAA               | For<br>Rev  | qPCR               |
| <i>CHS</i>   | 156 bp           | GCCAGCCCAAATCAAACAA<br>CAGTTCCACCAGCAAAACAA                | For<br>Rev  | qPCR               |
| <i>C4H</i>   | 147 bp           | TGGTCAATCGAATGGGGTAT<br>ATCACGGCGTTAAGGGTATG               | For<br>Rev  | qPCR               |
| <i>β-tub</i> | 147 bp           | TGTTGCTGTGTTGCTTGACA<br>AAGGCACCATCAAACCTCAG               | For<br>Rev  | qPCR               |

**Table S2.** List of PAL and 4CL protein sequences used to build phylogenetic trees presented in Figures 2b and 3b.

| Pal Accession number | Species                               | Pal Accession number | Species                     |
|----------------------|---------------------------------------|----------------------|-----------------------------|
| NP 181241.1 PAL1     | <i>Arabidopsis thaliana</i>           | NP001047481.1        | <i>Oryza sativa</i>         |
| NP190894 PAL2        | <i>Arabidopsis thaliana</i>           | NP001053324.1        | <i>Oryza sativa</i>         |
| NP196043.2 PAL3      | <i>Arabidopsis thaliana</i>           | NP001068565.1        | <i>Oryza sativa</i>         |
| NP187645.1 PAL4      | <i>Arabidopsis thaliana</i>           | NP001055608.1        | <i>Oryza sativa</i>         |
| XP755245.1           | <i>Aspergillus fumigatus</i>          | NP001047482.1        | <i>Oryza sativa</i>         |
| BAE55583.1           | <i>Aspergillus oryzae</i>             | NP001047484.1        | <i>Oryza sativa</i>         |
| AAR24505.1           | <i>Bambusa aldamii</i>                | AEZ67457.1           | <i>Perilla frutescens</i>   |
| XP 003580144.1       | <i>Brachypodium distachyon</i>        | P24481.1 PAL1        | <i>Petroselinum crispum</i> |
| P45726.1             | <i>Camelina sativa</i>                | P45728.1PAL2         | <i>Petroselinum crispum</i> |
| BAA05643.1           | <i>Camelia sinensis</i>               | P45729.1PAL3         | <i>Petroselinum crispum</i> |
| BAA95629.1           | <i>Catharanthus roseus</i>            | P19141PAL1           | <i>Phaseleus vulgaris</i>   |
| AAN32866.1           | <i>Coffea canephora</i>               | P19142PAL2           | <i>Phaseleus vulgaris</i>   |
| AEO92028.1           | <i>Coffea canephora</i>               | P19143PAL3           | <i>Phaseleus vulgaris</i>   |
| AEO92029.1           | <i>Coffea canephora</i>               | ABP96954.2           | <i>Phyllostachys edulis</i> |
| XP004143256.1        | <i>Cucumis sativus</i>                | 2001451APAL1         | <i>Pisum sativum</i>        |
| CAL91170.3           | <i>Cynara cardunculus var sclymus</i> | Q04593.1PAL2         | <i>Pisum sativum</i>        |
| BAA23367.1           | <i>Daucus carota</i>                  | ACC63890.1           | <i>Populus trichocarpa</i>  |
| ACM44926.1           | <i>Euphorbia pulcherrima</i>          | ACC63887.1           | <i>Populus trichocarpa</i>  |
| BAF98437.1           | <i>Glehnia littoralis</i>             | ACC63891.1           | <i>Populus trichocarpa</i>  |
| P27991.1 PAL1        | <i>Glycine max</i>                    | EGU13302.1           | <i>Rhodotorula graminis</i> |
| XP003521396.1        | <i>Glycine max</i>                    | CAD23828.1           | <i>Rhodotorula graminis</i> |
| XP003521397.1:1 like | <i>Glycine max</i>                    | EEF42935.1           | <i>Ricinus communis</i>     |
| XP003521398.1:2 like | <i>Glycine max</i>                    | ACF94716.1           | <i>Robinia pseudoacacia</i> |
| P14166.1 PAL1        | <i>Ipomoea batatas</i>                | ABD73282.1           | <i>Salvia miltiorrhiza</i>  |
| ABI33979.1           | <i>Jatropha curcas</i>                | P31425.1PAL1         | <i>Solanum tuberosum</i>    |
| AAL55242.1           | <i>Lacuca sativa</i>                  | P31426.1PAL2         | <i>Solanum tuberosum</i>    |
| BAF36971.1           | <i>Lotus japonicus</i>                | AAZ29732.1           | <i>Trifolium pratense</i>   |
| AAK60275 PAL2        | <i>Manihot esculenta</i>              | AAZ29734.1           | <i>Trifolium pratense</i>   |
| AAK62030.1 PAL1      | <i>Manihot esculenta</i>              | AAZ29735.1           | <i>Trifolium pratense</i>   |
| XP00350471.1         | <i>Medicago truncatula</i>            | CAA68036.1           | <i>Triticum aestivum</i>    |
| XP003591877.1        | <i>Medicago truncatula</i>            | Q43210.1             | <i>Triticum aestivum</i>    |
| XP003618076.1        | <i>Medicago truncatula</i>            | ABM67591.1           | <i>Vitis vinifera</i>       |
| CBJ23826.1           | <i>Melissa officinalis</i>            | ABM67591.2           | <i>Vitis vinifera</i>       |
| AEE81750.1           | <i>Morus alba var. multicaulis</i>    | XP003633987.1        | <i>Vitis vinifera</i>       |
| ABV26012.1           | <i>Musa acuminata</i>                 | AEX32784.1           | <i>Vitis vinifera</i>       |
| XP958734.1           | <i>Neurospora crassa</i>              | AEX32790.1           | <i>Vitis vinifera</i>       |
| ABG75910.1PAL1       | <i>Nicotiana attenuata</i>            | ACG43023.1           | <i>Zea mays</i>             |
| ABG75911.1 PAL2      | <i>Nicotiana attenuata</i>            | NP001147433.1        | <i>Zea mays</i>             |
| P25872 PAL1          | <i>Nicotiana tabacum</i>              | AFW72413.1           | <i>Zea mays</i>             |
| P35513PAL2           | <i>Nicotiana tabacum</i>              |                      |                             |

Table S2. Cont.

| 4CL Accession number | Species                               | 4CL Accession number | Species                                                   |
|----------------------|---------------------------------------|----------------------|-----------------------------------------------------------|
| AAL35216.1           | <i>Amorpha frutisa</i>                | Q42982.2 4CL2        | <i>Oryza sativa</i>                                       |
| AEE32699.1 4CL1      | <i>Arabidopsis thaliana</i>           | Q6ETN3.1 4CL3        | <i>Oryza sativa</i>                                       |
| AEE76480.1 4CL2      | <i>Arabidopsis thaliana</i>           | Q67W82.1 4CL4        | <i>Oryza sativa</i>                                       |
| AEE34323.1 4CL3      | <i>Arabidopsis thaliana</i>           | Q6ZAC1.1 4CL5        | <i>Oryza sativa</i>                                       |
| Q84P23.2AT4CL4       | <i>Arabidopsis thaliana</i>           | ABY21312.1 4CL1      | <i>Physmitrella patens</i><br>subsp. <i>magdalena</i>     |
| XP003172782.1        | <i>Arthroderma gypseum</i>            | ABV60448.14CL2       | <i>Physmitrella patens</i><br>subsp. <i>magdalena</i>     |
| XP001275317.1        | <i>Aspergillus clavatus</i>           | ABY21314.1 4CL3      | <i>Physmitrella patens</i><br>subsp. <i>patens</i>        |
| XP001826226.1        | <i>Aspergillus oryzae</i>             | AAC39366.1 4CL1      | <i>Populus trichocarpa</i> x<br><i>Populus deltooides</i> |
| EGF76873.1           | <i>Batrachochytrium dendrobatidis</i> | AAC39365.1 4CL2      | <i>Populus trichocarpa</i> x<br><i>Populus deltooides</i> |
| AAV65114.1           | <i>Betula platyphylla</i>             | AAK58908.14CL3       | <i>Populus trichocarpa</i> x<br><i>Populus deltooides</i> |
| ACF17632.1 4CL2      | <i>Capsicum annuum</i>                | ABV60450.1 4CL4      | <i>Populus trichocarpa</i> x<br><i>Populus deltooides</i> |
| AFP49811.1 4CL4      | <i>Coffea arabica</i>                 | AFY97681.1 4CL1      | <i>Pyrus pyrifolia</i>                                    |
| AAC97600.1 4CL2      | <i>Glycine max</i>                    | AEN72609.1           | <i>Rhodothermus marinus</i>                               |
| AAL98709.1           | <i>Glycine max</i>                    | EEF49284.1           | <i>Ricinus communis</i>                                   |
| AAC97599.1 4CL3      | <i>Glycine max</i>                    | AAF91310.1 4CL1      | <i>Rubus idaeus</i>                                       |
| CAC36095.1 4CL4      | <i>Glycine max</i>                    | ABY81911.14CL2       | <i>Ruta graveolens</i>                                    |
| ADK24217.1           | <i>Hibiscus cannabinus</i>            | AAP68991.1 4CL2      | <i>Salvia miltiorrhiza</i>                                |
| ACM69363.1           | <i>Humulus lupulus</i>                | P31684.1 4CL1        | <i>Solanum tuberosum</i>                                  |
| BAA08365.1           | <i>Lithospermum erythrorhizon</i>     | P31685.1 4CL2        | <i>Solanum tuberosum</i>                                  |
| AES84404.1           | <i>Medicago truncatula</i>            | ADF30254.1 4CL1      | <i>Sorbus aucuparia</i>                                   |
| O24145.14CL1         | <i>Nicotiana tabacum</i>              | DAA52791.1           | <i>Zea mays</i>                                           |
| O24146.14CL2         | <i>Nicotiana tabacum</i>              | AAS67644.1           | <i>Zea mays</i>                                           |
| P17814.2 4CL1        | <i>Oryza sativa</i>                   |                      |                                                           |

© 2013 by the authors; licensee MDPI, Basel, Switzerland. This article is an open access article distributed under the terms and conditions of the Creative Commons Attribution license (<http://creativecommons.org/licenses/by/3.0/>).
